# Supplementary material
Source: PubMed Central journal article supplement (PMC2293283)
Supplement: NIHMS39428-supplement-01.pdf [file NIHMS39428-supplement-01.pdf]

## Supplemental Data

### Sensorineural Deafness and Seizures in Mice

#### Lacking Vesicular Glutamate Transporter 3

Rebecca P. Seal, Omar Akil, Eunyoung Yi, Christopher M. Weber,  
Lisa Grant, Jong Yoo, Amanda Clause, Karl Kandler,  
Jeffrey L. Noebels, Elisabeth Glowatzki, Lawrence R. Lustig,  
and Robert H. Edwards

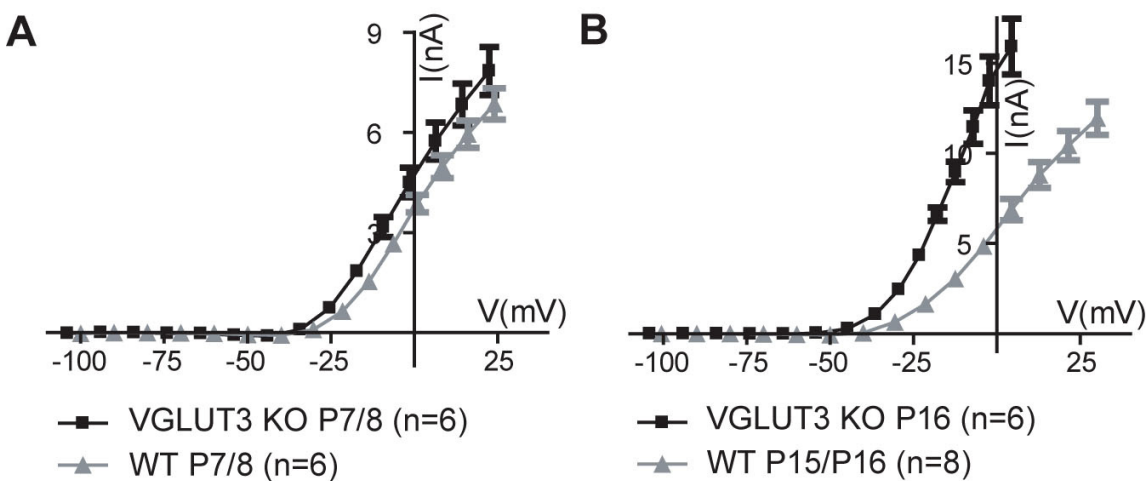

**Figure S1. IHC Potassium Conductances in VGLUT3 KO and WT Mice**

Current-voltage relationships for IHCs of VGLUT3 KO and WT mice at P7/8 (before onset of hearing) (A) and P16 (after hearing onset) (B). Current amplitudes were measured at the end of 100 ms voltage steps, and the values indicate mean  $\pm$  S.E. For both VGLUT3 KO and WT mice, current amplitudes increase significantly with age ( $p < 0.01$ ). At P15/16, however, potassium current amplitudes in VGLUT3 KO mice were significantly larger than in WT mice ( $p < 0.01$ ). Voltages were corrected for the error across the remaining uncompensated series resistance ( $< 5 \text{ M}\Omega$ ) and currents plotted against the mean voltage reached for each voltage step. For statistical analysis, data were binned according to actual voltage reached (bin width = 4 mV). Error bars indicate the standard error of the mean.
